# Supplementary material
Source: PubMed Central journal article supplement (PMC7483892)
Supplement: NIHMS1606244-supplement-1.pdf [file NIHMS1606244-supplement-1.pdf]

## Supplementary Figures

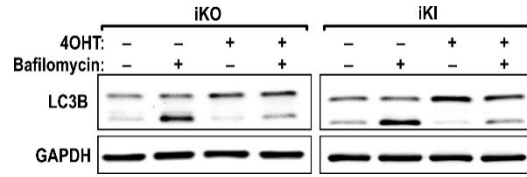

**Fig. S1.** Autophagy flux was inhibited to similar degrees in FIP200 KO and FIP200 KI PyMT cells. Immunoblots showing levels of LC3B and GAPDH in iKO and iKI tumor cells  $\pm$  4OHT treatment. In Bafilomycin A1 treated conditions, cells were treated for 2 hours with 200nM of bafilomycin.

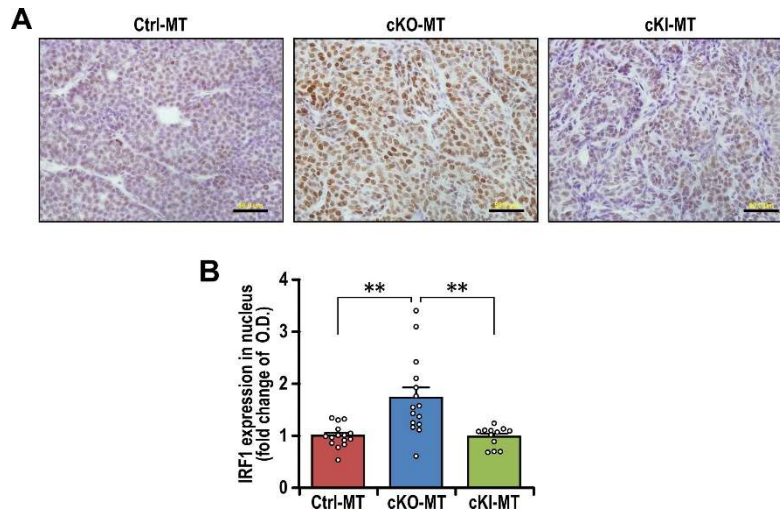

**Fig. S2.** Increased accumulation of nuclear IRF1 in cKO-MT tumors but not cKI-MT tumors, relative to Ctrl-MT tumors. **(A)** Immuno-histochemical analysis of IRF1 in Ctrl-MT, cKO-MT and cKI-MT tumors. Scale bar represents 50 $\mu$ m. **(B)** Quantification of optical density for IRF1 staining in Ctrl-MT, cKO-MT and cKI-MT tumors. Statistical significance was determined by Kruskal-Wallis test with Dunn's test, \*\* denotes  $p \leq 0.01$ .

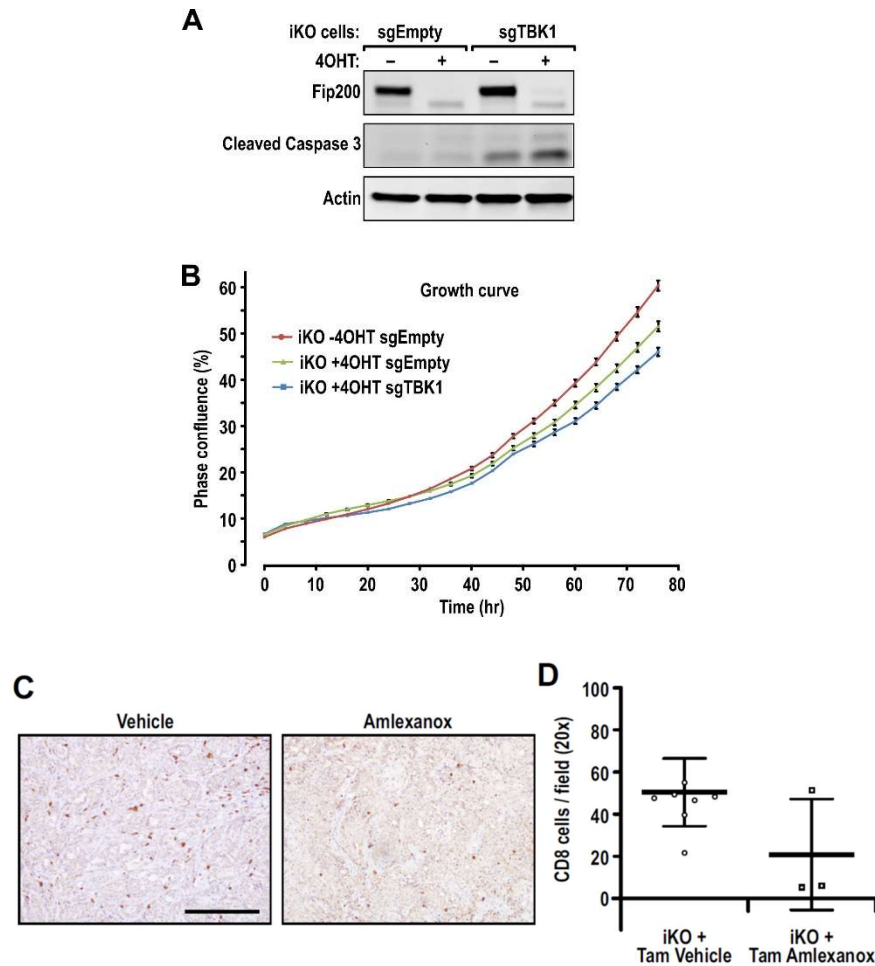

**Fig. S3.** Genetic depletion of TBK1 increased cleaved-caspase 3 levels in PyMT cells. **(A)** Immunoblots showing levels of FIP200, cleaved-caspase 3 and Actin in iKO cells transduced with sgEmpty or sgTBK1,  $\pm$  4OHT treatment. **(B)** Graph showing confluency of cells across time for iKO cells transduced with sgEmpty or sgTBK1,  $\pm$  4OHT treatment. **(C)** Representative images of iKO (+Tam) vehicle control and iKO (+Tam) amlexanox treated tumors immunostained for CD8. Scale bar represents 50 $\mu$ m. **(D)** Bar chart showing quantification of CD8 positive cells per field of view in iKO (+Tam) tumors (vehicle control; n=9, amlexanox; n=3 mice).

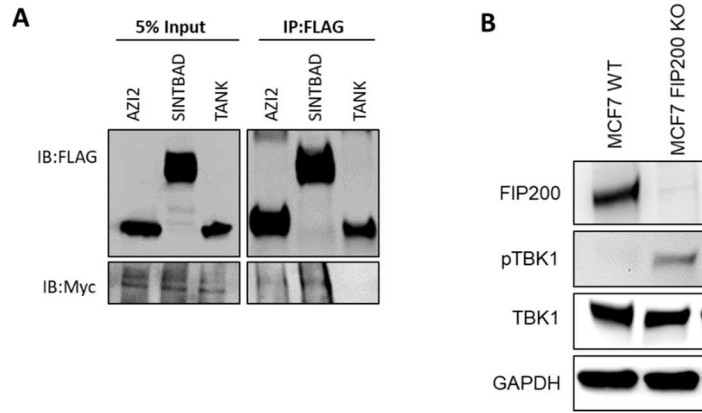

**Fig. S4.** Interaction between FIP200 and TBK1 adaptors and activation of TBK1 upon FIP200 ablation. **(A)** Immunoblots of co-IP experiments with FLAG antibody, in HEK293 cells transfected with either HA/FLAG-AZI2, HA/FLAG-SINTBAD or FLAG-TANK along with MYC-FIP200. **(B)** Immunoblots showing the levels of FIP200, p-TBK1, TBK1 and GAPDH in MCF7 WT (sgEmpty) and MCF7 FIP200KO (sgFIP200) cells.

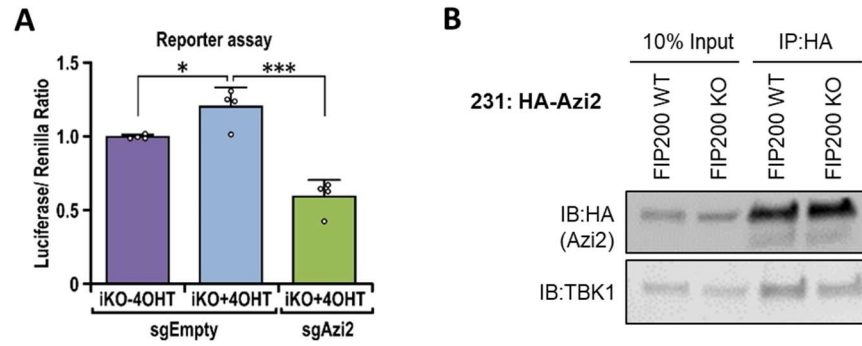

**Fig. S5.** Genetic depletion of AZI2 in iKO (+4OHT) cells diminished the increase in ISG56-reporter activity upon FIP200 ablation and loss of FIP200 does not increase the interaction between AZI2 and TBK1. **(A)** Bar charts showing luciferase/renilla luminescence ratios in iKO (-4OHT) sgEmpty, iKO (+4OHT) sgEmpty and iKO (+4OHT) sg AZI2 cells. Statistical significance was determined by ANOVA followed by Tukey's test, \* denotes  $p \leq 0.05$ , \*\*\* denotes  $p \leq 0.001$ . **(B)** Immunoblots of co-IP experiments with HA antibody, in MDA-MB-231 WT or FIP200 KO cells transfected with HA/FLAG-AZI2.

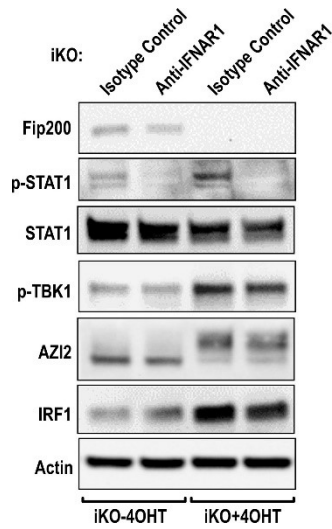

**Fig. S6.** Levels of TBK1 activation and AZI2 phosphorylation upon IFNAR1 blockade in FIP200 ablated cells. Immunoblots showing levels of FIP200, p-STAT1, STAT1, p-TBK1, AZI2, IRF1 and ACTIN in iKO cells ( $\pm$  4OHT), treated with 10 $\mu$ g/ml isotype control antibody or anti-IFNAR1 antibody for 24 hours.

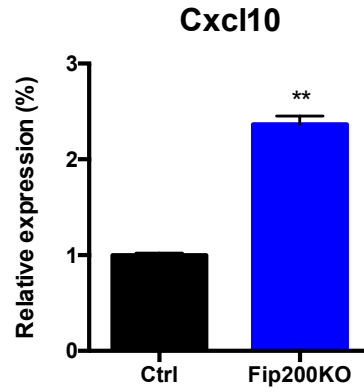

**Fig. S7.** Increased expression of CXCL10 in MDA-MB-231 human breast cancer cells upon ablation of FIP200. Bar chart showing levels of CXCL10 as determined by quantitative-PCR in Ctrl and FIP200 KO MDA-MB-231 cells. Statistical analysis was determined by t-test, \*\* denotes  $p \leq 0.01$ .

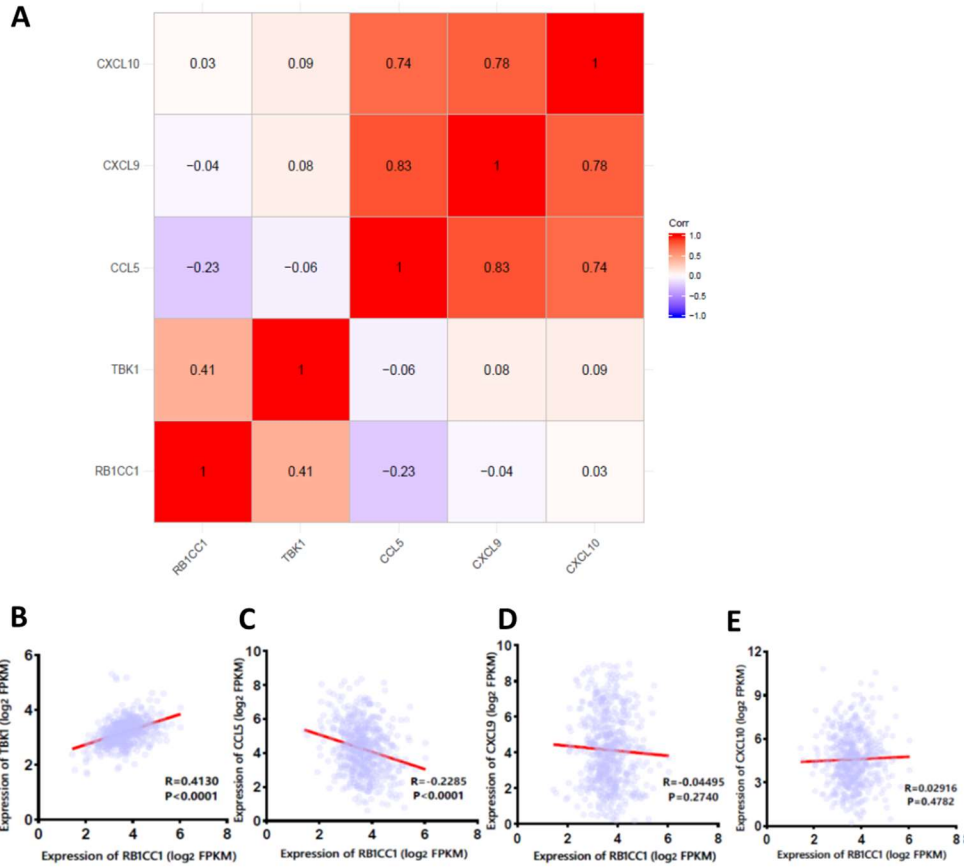

**Fig. S8.** Analysis of chemokine, FIP200 (RB1CC1) and TBK1 levels in breast cancers from the TCGA cohort. **(A)** Correlation matrix for Pearson's test of RB1CC1, TBK1, CCL5, CXCL9 and CXCL10. Scatter plots showing correlation among the expression of RB1CC1 with either **(B)** TBK1, **(C)** CCL5, **(D)** CXCL9 or **(E)** CXCL10. The correlation was calculated by Pearson correlation coefficient and Z-test, and the expression value was Log<sub>2</sub> transformed.
